# Supplementary material for: A CCSD estimation of the O–H bond dissociation enthalpies of pyrogallol
Source: Royal Society of Chemistry journal article supplement (doi:10.1039/b416841k), 2005-01-01
Supplement: b416841k.pdf [file b416841k.pdf]

## Supporting information

### A CCSD Estimation on O-H Bond Dissociation Enthalpies of

#### Pyrogallol

Hong-Fang Ji, and Hong-Yu Zhang\*

**Table S1. CCSD/6-31+G\*-calculated total energy (TE, in hartree) and cartesian coordinates (Å) for the parent phenol, phenolic radical, pyrogallol and pyrogallic radicals.**

**Phenol: TE = -306.5466054**

|   |   |           |           |           |
|---|---|-----------|-----------|-----------|
| 6 | 0 | 0.936327  | -0.021414 | -0.000161 |
| 8 | 0 | 2.312113  | -0.111858 | 0.000042  |
| 6 | 0 | 0.263834  | 1.203617  | 0.000029  |
| 6 | 0 | 0.223972  | -1.225229 | -0.000011 |
| 6 | 0 | -1.136023 | 1.220224  | -0.000017 |
| 6 | 0 | -1.171099 | -1.194364 | 0.000046  |
| 1 | 0 | 2.695841  | 0.781482  | 0.000136  |
| 1 | 0 | 0.823910  | 2.140235  | 0.000052  |
| 1 | 0 | 0.772688  | -2.165300 | -0.000013 |
| 6 | 0 | -1.860005 | 0.025733  | 0.000021  |
| 1 | 0 | -1.657410 | 2.176915  | 0.000092  |
| 1 | 0 | -1.725304 | -2.132445 | 0.000120  |
| 1 | 0 | -2.948665 | 0.042565  | -0.000168 |

**Phenolic radical: TE = -305.918101**

|   |   |           |           |           |
|---|---|-----------|-----------|-----------|
| 6 | 0 | 1.047607  | -0.000025 | -0.000534 |
| 8 | 0 | 2.305154  | -0.000034 | 0.000340  |
| 6 | 0 | 0.291590  | -1.245707 | -0.000140 |
| 6 | 0 | 0.291616  | 1.245730  | -0.000142 |
| 6 | 0 | -1.087331 | -1.228795 | 0.000129  |
| 6 | 0 | -1.087229 | 1.228843  | 0.000128  |
| 1 | 0 | 0.860443  | -2.173642 | 0.000076  |
| 1 | 0 | 0.860547  | 2.173618  | 0.000141  |
| 6 | 0 | -1.788479 | -0.000012 | -0.000041 |

# Supplementary Material (ESI) for New Journal of Chemistry  
# This journal is © The Royal Society of Chemistry and  
# The Centre National de la Recherche Scientifique, 2005

|   |   |           |           |          |
|---|---|-----------|-----------|----------|
| 1 | 0 | -1.645848 | -2.163870 | 0.000254 |
| 1 | 0 | -1.645818 | 2.163875  | 0.000202 |
| 1 | 0 | -2.877197 | 0.000099  | 0.000212 |

**Pyrogallol 1: TE = -456.6279455**

|   |   |           |           |           |
|---|---|-----------|-----------|-----------|
| 8 | 0 | -2.412934 | -0.666360 | -0.000016 |
| 6 | 0 | -1.222314 | 0.012751  | -0.000060 |
| 1 | 0 | -2.219576 | -1.623089 | 0.000067  |
| 6 | 0 | -0.014221 | -0.686402 | 0.000123  |
| 6 | 0 | -1.222441 | 1.409162  | 0.000056  |
| 8 | 0 | -0.078640 | -2.065364 | -0.000084 |
| 6 | 0 | 1.194394  | 0.009015  | -0.000122 |
| 6 | 0 | -0.005863 | 2.094208  | -0.000006 |
| 1 | 0 | -2.173636 | 1.936776  | 0.000016  |
| 8 | 0 | 2.320802  | -0.796652 | -0.000218 |
| 6 | 0 | 1.211959  | 1.403168  | 0.000043  |
| 1 | 0 | 0.830805  | -2.417322 | 0.001112  |
| 1 | 0 | -0.001884 | 3.182652  | 0.000047  |
| 1 | 0 | 3.122114  | -0.246113 | 0.001191  |
| 1 | 0 | 2.159267  | 1.942690  | -0.000096 |

**Pyrogallolic radical 1a: TE = -456.0084882**

|   |   |           |           |           |
|---|---|-----------|-----------|-----------|
| 8 | 0 | -2.471046 | -0.314017 | 0.000017  |
| 6 | 0 | -1.182970 | 0.154712  | 0.000033  |
| 1 | 0 | -2.446697 | -1.289539 | 0.000202  |
| 6 | 0 | -0.095861 | -0.708645 | -0.000078 |
| 6 | 0 | -0.955205 | 1.532864  | -0.000015 |
| 8 | 0 | -0.307331 | -2.048102 | -0.000041 |
| 6 | 0 | 1.273333  | -0.217340 | -0.000001 |
| 6 | 0 | 0.372704  | 2.051475  | 0.000007  |
| 1 | 0 | -1.812338 | 2.202947  | 0.000027  |
| 8 | 0 | 2.205204  | -1.062148 | 0.000067  |
| 6 | 0 | 1.465889  | 1.223157  | -0.000033 |
| 1 | 0 | 0.583002  | -2.465440 | -0.000037 |
| 1 | 0 | 0.506985  | 3.131600  | -0.000004 |
| 1 | 0 | 2.487095  | 1.597238  | -0.000003 |

**Pyrogallolic radical 1b: TE = -456.017609**

|   |   |          |           |           |
|---|---|----------|-----------|-----------|
| 8 | 0 | 2.390192 | -0.722355 | -0.000058 |
| 6 | 0 | 1.244372 | -0.007944 | -0.000037 |

# Supplementary Material (ESI) for New Journal of Chemistry  
# This journal is © The Royal Society of Chemistry and  
# The Centre National de la Recherche Scientifique, 2005

|   |   |           |           |           |
|---|---|-----------|-----------|-----------|
| 1 | 0 | 2.133095  | -1.670126 | -0.000013 |
| 6 | 0 | 0.000000  | -0.760080 | 0.000045  |
| 6 | 0 | 1.237878  | 1.373034  | 0.000031  |
| 8 | 0 | 0.000000  | -2.022018 | 0.000081  |
| 6 | 0 | -1.244371 | -0.007943 | -0.000036 |
| 6 | 0 | 0.000000  | 2.046087  | 0.000005  |
| 1 | 0 | 2.177187  | 1.921066  | 0.000012  |
| 8 | 0 | -2.390192 | -0.722354 | -0.000062 |
| 6 | 0 | -1.237878 | 1.373034  | 0.000036  |
| 1 | 0 | 0.000001  | 3.134808  | 0.000036  |
| 1 | 0 | -2.133096 | -1.670125 | -0.000006 |
| 1 | 0 | -2.177186 | 1.921067  | 0.000020  |

**Pyrogallolic radical 1c: TE = -456.0066869**

|   |   |           |           |           |
|---|---|-----------|-----------|-----------|
| 8 | 0 | -2.427850 | -0.586796 | 0.000039  |
| 6 | 0 | -1.242763 | 0.055572  | 0.000045  |
| 1 | 0 | -2.215751 | -1.547609 | 0.000082  |
| 6 | 0 | -0.051130 | -0.790128 | -0.000005 |
| 6 | 0 | -1.163740 | 1.437247  | -0.000039 |
| 8 | 0 | -0.185516 | -2.038358 | -0.000085 |
| 6 | 0 | 1.236635  | -0.106482 | 0.000056  |
| 6 | 0 | 0.105429  | 2.033820  | 0.000008  |
| 1 | 0 | -2.072076 | 2.035197  | -0.000025 |
| 8 | 0 | 2.317250  | -0.927795 | 0.000009  |
| 6 | 0 | 1.296399  | 1.274164  | -0.000051 |
| 1 | 0 | 0.179875  | 3.119880  | -0.000039 |
| 1 | 0 | 3.131017  | -0.391761 | 0.000245  |
| 1 | 0 | 2.260875  | 1.782722  | -0.000059 |

**Pyrogallolic radical 1d: TE = -456.0027865**

|   |   |           |           |           |
|---|---|-----------|-----------|-----------|
| 6 | 0 | -0.548678 | 2.007801  | 0.000369  |
| 6 | 0 | 0.816163  | 1.593668  | -0.000427 |
| 6 | 0 | -1.561794 | 1.087385  | 0.000061  |
| 1 | 0 | -0.770967 | 3.073358  | 0.000488  |
| 6 | 0 | 1.131382  | 0.239527  | -0.000074 |
| 6 | 0 | -1.279415 | -0.345783 | -0.000088 |
| 1 | 0 | 1.610261  | 2.340536  | -0.001293 |
| 1 | 0 | -2.610278 | 1.377256  | 0.000254  |
| 8 | 0 | -2.189090 | -1.205337 | -0.000077 |
| 8 | 0 | 2.420014  | -0.267166 | -0.001700 |
| 6 | 0 | 0.127925  | -0.733470 | 0.000036  |

# Supplementary Material (ESI) for New Journal of Chemistry  
# This journal is © The Royal Society of Chemistry and  
# The Centre National de la Recherche Scientifique, 2005

|   |   |          |           |          |
|---|---|----------|-----------|----------|
| 8 | 0 | 0.418713 | -2.051487 | 0.000266 |
| 1 | 0 | 3.069222 | 0.456268  | 0.011232 |
| 1 | 0 | 1.391164 | -2.150274 | 0.002152 |

**Table S2. B3LYP/6-31+G\*-calculated thermal correction to enthalpy (TCE, in hartree) and cartesian coordinates (Å) for the parent phenol, phenolic radical, pyrogallol and pyrogallic radicals.**

**Phenol: TCE = 0.110983**

C,0,0.0379233173,0.0004409267,0.9390064352  
O,0,0.0389474521,0.0008191873,2.3124391647  
C,0,1.2162298511,0.0003467468,0.1849772261  
C,0,-1.2076067112,-0.0001404852,0.3015645411  
C,0,1.1439676887,-0.0001983029,-1.2114113342  
C,0,-1.2661996243,-0.0007361924,-1.0920242559  
H,0,0.9518044419,0.001046258,2.6406802397  
H,0,2.1844010098,0.0007403657,0.6836835991  
H,0,-2.1093298685,-0.0001556745,0.9068189752  
C,0,-0.0941575431,-0.0006708969,-1.8576198884  
H,0,2.0636141393,-0.0001895224,-1.791398693  
H,0,-2.2360491446,-0.001185476,-1.5834626827  
H,0,-0.1469620662,-0.0010602265,-2.9427911

**Phenolic radical: TCE = 0.097837**

C,0,0.0000448122,0.0002382401,1.0471392428  
O,0,0.0001020865,0.0001857418,2.3074213852  
C,0,1.2414058941,0.0006493517,0.2911795515  
C,0,-1.2413738153,-0.0005798526,0.291289574  
C,0,1.226794958,0.0004787463,-1.0886939199  
C,0,-1.2268913877,-0.0007254272,-1.088590928  
H,0,2.1677924359,0.0011153828,0.8582294298  
H,0,-2.1677058503,-0.0010034746,0.8584296886  
C,0,-0.000086713,-0.0002038993,-1.7872299947  
H,0,2.1599804247,0.0008555727,-1.6464080403  
H,0,-2.1601301865,-0.0012860476,-1.6462183833  
H,0,-0.0001160057,-0.0003103213,-2.8739649302

**Pyrogallol 1: TCE = 0.121679**

O,0,-0.619308471,0.0085293549,-2.4228004594  
C,0,-0.6200355123,0.003996698,-1.0570001788

# Supplementary Material (ESI) for New Journal of Chemistry  
# This journal is © The Royal Society of Chemistry and  
# The Centre National de la Recherche Scientifique, 2005

H,0,0.3032042087,0.0088231925,-2.7323358385  
C,0,0.5897547961,0.000741015,-0.3552955459  
C,0,-1.8307686529,0.0025577425,-0.3598709119  
O,0,1.7518946279,0.0024038189,-1.0928757943  
C,0,0.5879520397,-0.0038695904,1.0402354498  
C,0,-1.8201011923,-0.0020973645,1.0360548666  
H,0,-2.7596331406,0.0050984641,-0.9211092059  
O,0,1.8420494596,-0.0066622305,1.6191268039  
C,0,-0.6149240524,-0.0053466555,1.7474213095  
H,0,2.5095914554,-0.0010186151,-0.4838723123  
H,0,-2.7602829424,-0.0032269266,1.5799399502  
H,0,1.7680450896,-0.0108545881,2.5852483723  
H,0,-0.6092741576,-0.0088801435,2.8352546962

**Pyrogallolic radical 1a: TCE = 0.109037**

O,0,-0.6337145398,0.0026584905,-2.4127598055  
C,0,-0.5922963099,-0.0000612744,-1.0480206827  
H,0,0.2752550598,0.0066650341,-2.7586561906  
C,0,0.6174261819,0.0031682737,-0.3543604606  
C,0,-1.7778142551,-0.0062575388,-0.3153518545  
O,0,1.7818431536,0.0090549751,-1.0283055896  
C,0,0.6752036641,0.0004068448,1.1034983108  
C,0,-1.7591655026,-0.009198083,1.1085911877  
H,0,-2.7207264894,-0.0088666555,-0.8536846836  
O,0,1.8184609135,0.0035845117,1.6344947018  
C,0,-0.5817267414,-0.0061092266,1.816710749  
H,0,2.4843829026,0.0104975138,-0.3373223402  
H,0,-2.7099047254,-0.014065737,1.6344192517  
H,0,-0.5514851877,-0.0083079478,2.9014060118

**Pyrogallolic radical 1b: TCE = 0.110087**

O,0,-0.5859872428,0.0129261511,-2.4195178479  
C,0,-0.6264049421,0.0224512628,-1.0764410443  
H,0,0.3615277651,-0.0316241978,-2.6711347334  
C,0,0.6516317271,-0.0320713914,-0.3853188544  
C,0,-1.8122470773,0.0809150493,-0.3657805394  
O,0,1.7385998754,-0.0850076212,-1.0282402203  
C,0,0.6398335018,-0.0234146179,1.0685433647  
C,0,-1.7598489951,0.086441905,1.0407198741  
H,0,-2.7601477853,0.1213677307,-0.8923099889  
O,0,1.8347902422,-0.074501903,1.6810174395

# Supplementary Material (ESI) for New Journal of Chemistry  
# This journal is © The Royal Society of Chemistry and  
# The Centre National de la Recherche Scientifique, 2005

C,0,-0.5542297308,0.0353331714,1.7652679946  
H,0,-2.6942679644,0.1325280143,1.5933473892  
H,0,2.5120871931,-0.1089512678,0.9717591863  
H,0,-0.5508291093,0.0414144318,2.8503184044

**Pyrogallolic radical 1c: TCE = 0.109233**

O,0,-0.5643892193,0.0059748395,-2.4222736621  
C,0,-0.6150445075,0.002328006,-1.0834478024  
H,0,0.3944960645,0.0077172842,-2.6492210366  
C,0,0.6819376932,0.0017921847,-0.4037439643  
C,0,-1.8120816173,-0.0005849066,-0.3855783034  
O,0,1.727091033,0.0045826669,-1.1015714945  
C,0,0.6587235723,-0.0022588678,1.0523185669  
C,0,-1.7650255783,-0.0042582633,1.0148102746  
H,0,-2.7561368946,0.0000028013,-0.9205755209  
O,0,1.870882616,-0.0028959902,1.6507142046  
C,0,-0.5501374103,-0.0051094198,1.7300694696  
H,0,-2.6965533529,-0.0065632898,1.5740067597  
H,0,1.7643544599,-0.0058402653,2.6161170078  
H,0,-0.5650686272,-0.0080610582,2.8181509606

**Pyrogallolic radical 1d: TCE = 0.108663**

C,0,-1.7325341925,0.0026107322,-1.1466302993  
C,0,-1.7674043815,-0.0016629939,0.2753406009  
C,0,-0.5389105067,0.0055011043,-1.8223110081  
H,0,-2.673457983,0.0037439665,-1.6897907509  
C,0,-0.5837706115,-0.0034623002,1.0021887523  
C,0,0.7306489267,0.0040356012,-1.1126362763  
H,0,-2.7232152064,-0.0033747421,0.7951245754  
H,0,-0.4890312733,0.008947724,-2.9064975042  
O,0,1.8352057812,0.0063729,-1.7031246921  
O,0,-0.5059120381,-0.0069776559,2.3801354202  
C,0,0.6571058768,-0.0007602381,0.3495649767  
O,0,1.8065041719,-0.0024546469,1.0423437063  
H,0,-1.3893708331,-0.0162221688,2.7784082619  
H,0,1.5978813083,-0.0061909899,1.994819465
